# Supplementary material
Source: Royal Society of Chemistry journal article supplement (doi:10.1039/d5en01218j)
Supplement: d5en01218j1.pdf [file d5en01218j1.pdf]

**Mechanistic insights into Sb(III) adsorption and oxidation on MnO<sub>2</sub> facets**

Rohit Kumar<sup>†§</sup>, Song Chai<sup>†§</sup>, Ran Mao<sup>‡§</sup>, Yanpeng Chen<sup>†§</sup>, Hasan Ubaid Ullah<sup>‡§</sup>, Jianbo Shi<sup>†§\*</sup>,

Li Yan<sup>†§\*</sup>

<sup>†</sup>State Key Laboratory of Environmental Chemistry and Ecotoxicology, Research

Center for Eco-Environmental Sciences, Chinese Academy of Sciences, Beijing

100085, China

<sup>‡</sup>Key Laboratory of Drinking Water Science and Technology, Research Center for Eco-

Environmental Sciences, Chinese Academy of Sciences, Beijing 100085, China

<sup>§</sup>University of Chinese Academy of Sciences, Beijing 100049, China

Tel: +86 15101509384

E-mail: liyan@rcees.ac.cn

## 1. Text S1. Synthesis of MnO<sub>2</sub> facets

**Synthesis of  $\delta$ -001:** The synthesis of  $\delta$ -001 with stacked nanosheets involved the addition of 0.45 g KMnO<sub>4</sub>, 0.1 g urea, 1 mL HCl (37 wt%), and 0.15 g cetyltrimethylammonium bromide (CTAB) into 40 mL deionized (DI) water. The mixture was then heated at 100 °C for 24 hours in a hydrothermal reactor. The ultimate precipitate was rinsed, dehydrated at a temperature of 90 °C overnight, and subjected to calcination for a duration of 2 hours at a temperature of 300 °C in the presence of air. The product was designated as  $\delta$ -001.<sup>1</sup>

**Synthesis of  $\alpha$ -310:**  $\alpha$ -310 was synthesized using a hydrothermal redox process involving KMnO<sub>4</sub> and (NH<sub>4</sub>)<sub>2</sub>C<sub>2</sub>O<sub>4</sub>. During a standard process, 3.16 g of KMnO<sub>4</sub> and 1.38 g of (NH<sub>4</sub>)<sub>2</sub>C<sub>2</sub>O<sub>4</sub>·H<sub>2</sub>O were dissolved in 70 mL of DI water using strong magnetic stirring. Subsequently, the solution mixture was moved to a Teflon-lined stainless-steel autoclave with a volume of 100 mL. The autoclave was subjected to heating in an electric oven and maintained at a temperature of 180 °C for a duration of 24 hours. Once the autoclave had naturally cooled to the ambient temperature, the precipitates were gathered through the process of centrifugation, subjected to multiple washes using DI water, and subsequently dried at a temperature of 105 °C.<sup>2</sup>

**Synthesis of  $\alpha$ -110:** Two distinct hydrothermal reaction methods were utilized in Teflon-lined autoclaves to produce  $\alpha$ -110 nanowires with varying exposed planes. The synthesis of rectangular  $\alpha$ -110 was achieved using a hydrothermal technique.<sup>3</sup> KMnO<sub>4</sub> (Aldrich, 99.0%) and NH<sub>4</sub>F (Aldrich, 99.99%) were employed to synthesize  $\alpha$ -110 through neutral hydrothermal conditions. As part of a typical procedure, a solution was created by completely dissolving 0.15 g of KMnO<sub>4</sub> and 0.037 g of NH<sub>4</sub>F in 40 mL of water that had been purified twice, using magnetic stirring to assist the process. The resultant solution exhibited transparency. The solution was put into a 50

mL autoclave equipped with a Teflon liner. The autoclave was hermetically sealed and kept at a temperature of 150 °C for a duration of 24 hours. Subsequently, it was allowed to cool down to the ambient temperature without any external intervention. The suspension was thereafter subjected to alternating centrifugation with doubly DI water and ethanol many times. The resulting brown precipitate was then dried in an oven at a temperature of 80 °C for a duration of 10 hours.

### **Text S2. In situ flow cell ATR-FTIR study**

The Thermo-Nicolet iS50R FTIR spectrometer, fitted with a horizontal attenuated total reflectance (ATR) cell from PIKE Tech and a liquid-nitrogen-cooled mercury-cadmium-telluride (MCT) detector, was used to perform in situ flow cell ATR-FTIR observations. For a standard experiment, a 0.5 mL solution containing 4.0 g/L of the adsorbent was applied onto the ZnSe crystal and allowed to dry naturally at room temperature. In order to eliminate the loosely adhered particles and other contaminants on the surface of the coated film, a solution of NaCl with a concentration of 0.04 M and a pH of 7 was employed to cleanse the surface. The rinsing process was carried out at a rate of 0.5 mL per minute until there was no observable alteration in the IR spectra, which took approximately 2 hours. A background spectrum was obtained by measuring and recording the absorbance of the coated film and ZnSe crystal. Subsequently, a solution containing 50 mg/L of Sb(III) in a 0.04 M NaCl solution was introduced into the flow cell at a pH of 7. Spectra ranging from 4000 to 650  $\text{cm}^{-1}$  were obtained at 15-minute intervals until adsorption reached equilibrium, which took approximately 4 hours. During the process of collecting spectra, all solutions were thoroughly purged with nitrogen gas in the absence of light.

The spectra were collected and analyzed using the Omnic 9.2 software (Thermo Fisher Scientific Inc., USA), which involved performing subtraction, normalizing, and baseline correction. The

spectra were deconvoluted using the PeakFit software package (Systat Software Inc). The number and centroid positions of contributing bands were determined by calculating second-derivative spectra. The experimental spectra were subsequently adjusted by maximizing the amplitudes and widths of the Gaussian functions. The width of each band remained consistent throughout the fitting process.<sup>4</sup>

### **Text S3. Calculation of surface undercoordinated Mn site density**

To compare the abundance of reactive Mn sites across facets, we calculated the surface undercoordinated Mn site density using a coordination-based criterion. For each facet, the number of undercoordinated surface Mn sites ( $N_{Mn}^{uc}$ ) was counted and normalized by the in-plane surface area  $A$  of the slab unit cell to give:

$$\rho_{Mn}^{uc} = \frac{N_{Mn}^{uc}}{A} (\text{Mn}/\text{nm}^2)$$

where  $A$  is the in-plane area of the slab (computed from lattice parameters as  $A = ab \sin \gamma$  (Table S1)).

## 2. Figures

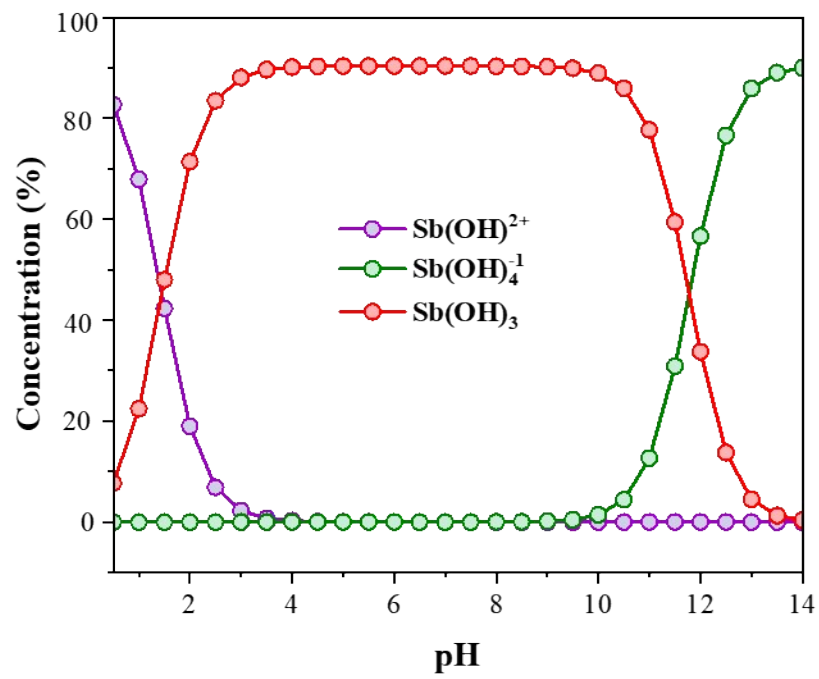

**Fig. S1.** The speciation of Sb(III) as a function of pH.

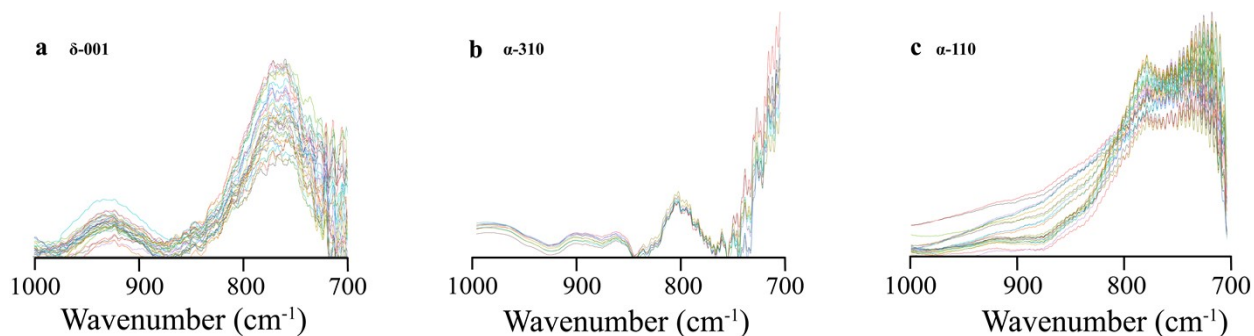

**Fig. S2.** (a-c) ATR-FTIR spectra of 50 mg/L Sb(III) adsorption on the  $\delta$ -001,  $\alpha$ -310, and  $\alpha$ -110 MnO<sub>2</sub> facets with increasing time at pH 7. The samples were prepared by reacting 50 mg/L Sb(III) on 0.5 g/L MnO<sub>2</sub> in 0.04 M NaCl at pH 7.

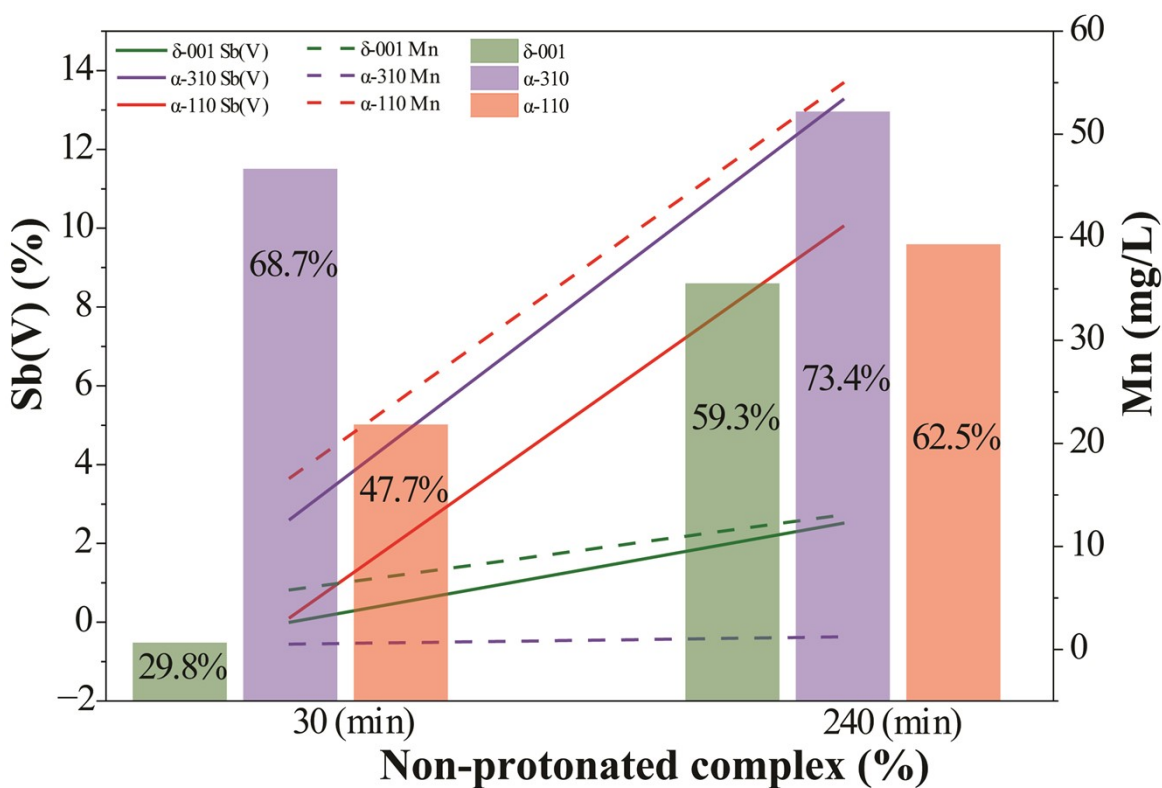

**Fig. S3.** The percentages of non-protonated Sb surface complex on  $\delta$ -001,  $\alpha$ -310, and  $\alpha$ -110 MnO<sub>2</sub>, and the relationship with Sb oxidation rate and Mn dissolution.

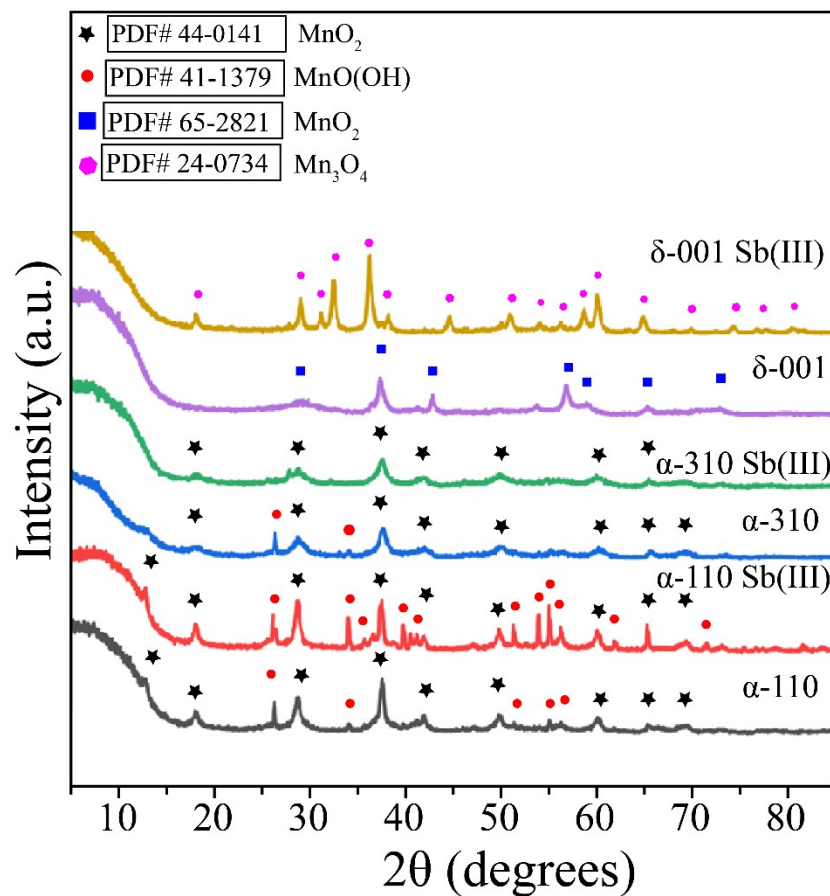

Fig. S4. XRD patterns for  $\delta$ -001,  $\alpha$ -310, and  $\alpha$ -110  $\text{MnO}_2$  before and after  $\text{Sb(III)}$  adsorption.

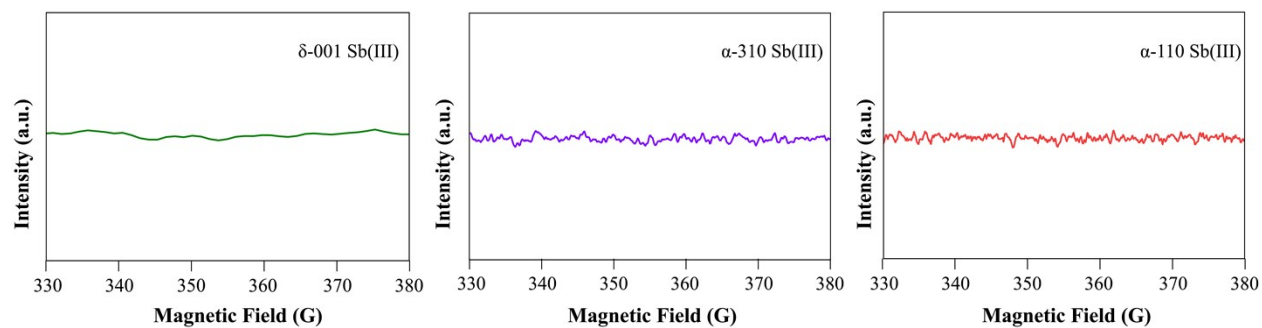

Fig. S5. EPR spectra of  $\text{MnO}_2$  facets after  $\text{Sb(III)}$  adsorption in the presence of DMPO.

### 3. Tables

**Table S1.** Mn site density on different facets.

| Facets        | $a(\text{\AA})$ | $b(\text{\AA})$ | $\gamma(^{\circ})$ | $A = a \cdot b \cdot \sin \gamma$<br>( $\text{\AA}^2$ ) | $A$<br>( $\text{nm}^2$ ) | $N_{Mn}^{uc}$ | $\rho_{Mn}^{uc} = \frac{N}{A}$<br>( $\text{Mn}/\text{nm}^2$ ) |
|---------------|-----------------|-----------------|--------------------|---------------------------------------------------------|--------------------------|---------------|---------------------------------------------------------------|
| $\delta$ -001 | 11.5935         | 11.3840         | 119.4041           | 114.98                                                  | 1.1498                   | 16            | 13.91                                                         |
| $\alpha$ -310 | 8.5410          | 15.5840         | 95.2409            | 132.55                                                  | 1.3255                   | 9             | 6.79                                                          |
| $\alpha$ -110 | 8.5410          | 14.1695         | 101.5911           | 118.55                                                  | 1.1855                   | 5             | 4.22                                                          |

**Table S2.** Langmuir model parameters for Sb(III) adsorption on  $\text{MnO}_2$  facets.

| $\text{MnO}_2$ facets | Langmuir model |           |       |
|-----------------------|----------------|-----------|-------|
|                       | K (L/mg)       | Qm (mg/g) | $R^2$ |
| $\delta$ -001         | 0.00629        | 153.9     | 0.996 |
| $\alpha$ -310         | 0.01824        | 107.3     | 0.981 |
| $\alpha$ -110         | 0.11318        | 70.4      | 0.971 |

**Table S3.** Kinetic models parameters for Sb(III) adsorption on  $\text{MnO}_2$  facets.

| $\text{MnO}_2$ facets | pseudo-first-order model                                        |       | pseudo-second-order model                                       |       |
|-----------------------|-----------------------------------------------------------------|-------|-----------------------------------------------------------------|-------|
|                       | $k_1$ ( $\text{g} \cdot \text{mg}^{-1} \cdot \text{min}^{-1}$ ) | $R^2$ | $k_2$ ( $\text{g} \cdot \text{mg}^{-1} \cdot \text{min}^{-1}$ ) | $R^2$ |
| $\delta$ -001         | 0.97717                                                         | 0.969 | 0.00021                                                         | 0.988 |
| $\alpha$ -310         | 0.97937                                                         | 0.965 | 0.00018                                                         | 0.976 |
| $\alpha$ -110         | 1.00001                                                         | 0.972 | 0.00002                                                         | 0.970 |

**Table S4.** Peak fit and calculated modes of IR spectra for 50 mg/L Sb(III) adsorption on MnO<sub>2</sub> facets.

| Color in the given figure    | Peak position (cm <sup>-1</sup> ) | Peak area (%) | Assignments                                                           | Calculated position (cm <sup>-1</sup> ) |
|------------------------------|-----------------------------------|---------------|-----------------------------------------------------------------------|-----------------------------------------|
| <b>δ-001 Sb(III) 30 min</b>  |                                   |               |                                                                       |                                         |
| Blue                         | 770                               | 37.8          | v Mn-O = (Mn-O) <sub>2</sub> -Sb(III)-OH                              | 771                                     |
| Olive                        | 846                               | 32.2          | v Sb(III)-O-Mn = (Mn-O) <sub>2</sub> -Sb(III)-OH                      | 830                                     |
| Magenta                      | 920                               | 29.8          | v Mn-O = Mn-O-Sb(III)-O <sub>2</sub>                                  | 913                                     |
| <b>δ-001 Sb(III) 240 min</b> |                                   |               |                                                                       |                                         |
| Blue                         | 755                               | 45.6          | v <sub>s</sub> Sb(V)-O-Mn = (Mn-O) <sub>2</sub> -Sb(V)-O <sub>4</sub> | 752                                     |
| Olive                        | 782                               | 31.1          | v Mn-O = (Mn-O) <sub>2</sub> -Sb(III)-OH                              | 771                                     |
| Magenta                      | 825                               | 9.4           | v Sb(III)-O-Mn = (Mn-O) <sub>2</sub> -Sb(III)-OH                      | 830                                     |
| Yellow                       | 923                               | 13.7          | v Mn-O = Mn-O-Sb(III)-O <sub>2</sub>                                  | 913                                     |
| <b>α-310 Sb(III) 30 min</b>  |                                   |               |                                                                       |                                         |
| Blue                         | 751                               | 37.6          | v <sub>s</sub> Sb(V)-O-Mn = (Mn-O) <sub>2</sub> -Sb(V)-O <sub>4</sub> | 752                                     |
| Olive                        | 817                               | 13.9          | v <sub>s</sub> Sb(III)-O-Mn = (Mn-O) <sub>2</sub> -Sb(III)-O          | 799                                     |
| Magenta                      | 852                               | 11.8          | v Sb(III)-O-Mn = (Mn-O) <sub>2</sub> -Sb(III)-OH                      | 855                                     |
| Yellow                       | 922                               | 17.2          | v Mn-O = Mn-O-Sb(III)-O <sub>2</sub>                                  | 913                                     |
| Sky                          | 956                               | 19.3          | v Mn-O = (Mn-O) <sub>2</sub> -Sb(III)-OH                              | 974                                     |
| <b>α-310 Sb(III) 240 min</b> |                                   |               |                                                                       |                                         |
| Blue                         | 757                               | 47.2          | v <sub>s</sub> Sb(V)-O-Mn = (Mn-O) <sub>2</sub> -Sb(V)-O <sub>4</sub> | 752                                     |
| Olive                        | 809                               | 5.4           | v <sub>s</sub> Sb(III)-O-Mn = (Mn-O) <sub>2</sub> -Sb(III)-O          | 799                                     |
| Magenta                      | 855                               | 4.3           | v Sb(III)-O-Mn = (Mn-O) <sub>2</sub> -Sb(III)-OH                      | 855                                     |
| Yellow                       | 919                               | 20.8          | v Mn-O = Mn-O-Sb(III)-O <sub>2</sub>                                  | 913                                     |
| Sky                          | 953                               | 21.9          | v Mn-O = (Mn-O) <sub>2</sub> -Sb(III)-OH                              | 974                                     |
| <b>α-110 Sb(III) 30 min</b>  |                                   |               |                                                                       |                                         |
| Blue                         | 773                               | 25.1          | v Mn-O = (Mn-O) <sub>2</sub> -Sb(III)-OH                              | 771                                     |
| Olive                        | 830                               | 27            | v Sb(III)-O-Mn = (Mn-O) <sub>2</sub> -Sb(III)-OH                      | 830                                     |
| Magenta                      | 886                               | 28.4          | v Mn-O = (Mn-O) <sub>2</sub> -Sb(III)-O                               | 878                                     |
| Yellow                       | 940                               | 19.3          | v Mn-O = Mn-O-Sb(III)-O <sub>2</sub>                                  | 913                                     |
| <b>α-110 Sb(III) 240 min</b> |                                   |               |                                                                       |                                         |
| Blue                         | 733                               | 40.2          | v Sb(V)-O-Mn = (Mn-O) <sub>2</sub> -Sb(V)-O <sub>4</sub>              | 735                                     |
| Olive                        | 773                               | 37.3          | v Mn-O = (Mn-O) <sub>2</sub> -Sb(III)-OH                              | 771                                     |
| Magenta                      | 801                               | 17.1          | v <sub>s</sub> Sb(III)-O-Mn = (Mn-O) <sub>2</sub> -Sb(III)-O          | 799                                     |
| Yellow                       | 925                               | 5.2           | v Mn-O = Mn-O-Sb(III)-O <sub>2</sub>                                  | 913                                     |

**Table S5.** XPS fitting results for pristine and Sb-adsorbed MnO<sub>2</sub> facets.

| MnO <sub>2</sub> facets | $\delta$ -001 | $\delta$ -001 | $\alpha$ -310 | $\alpha$ -310 | $\alpha$ -110 | $\alpha$ -110 |
|-------------------------|---------------|---------------|---------------|---------------|---------------|---------------|
|                         | Pristine      | Adsorbed      | Pristine      | Adsorbed      | Pristine      | Adsorbed      |
| Mn (III)                | 72%           | 65%           | 74%           | 74%           | 65%           | 51%           |
| Mn(IV)                  | 28%           | 35%           | 26%           | 26%           | 35%           | 49%           |
| O <sub>ads</sub>        | 35%           | 39%           | 52%           | 19%           | 42%           | 34%           |
| O <sub>lat</sub>        | 65%           | 24%           | 48%           | 20%           | 58%           | 26%           |
| Sb(III)                 |               | 32%           |               | 28%           |               | 32%           |
| Sb(V)                   |               | 5%            |               | 33%           |               | 8%            |

**Table S6.** XPS fitting results for Mn(III)/Mn(IV) and O<sub>ads</sub>/O<sub>lat</sub> ratios for pristine and Sb-adsorbed samples.

| MnO <sub>2</sub> facets | Mn(III)/Mn(IV) | Mn(III)/Mn(IV) | O <sub>ads</sub> /O <sub>lat</sub> | O <sub>ads</sub> /O <sub>lat</sub> |
|-------------------------|----------------|----------------|------------------------------------|------------------------------------|
|                         | Pristine       | Adsorbed       | Pristine                           | Adsorbed                           |
| $\delta$ -001           | 2.6            | 1.9            | 0.5                                | 1.6                                |
| $\alpha$ -310           | 2.8            | 2.8            | 1.0                                | 0.9                                |
| $\alpha$ -110           | 1.9            | 1.0            | 0.7                                | 1.3                                |

**Table S7.** The comparison of Sb adsorption capacities, Mn dissolution, XPS, XRD and EPR results for Sb reaction on MnO<sub>2</sub>.

| Sample                    | Adsorption capacity<br>q <sub>max</sub><br>(mg/g) | Mn dissolution<br>(mg/L) | pH | XPS Mn(III)<br>(eV) | XPS Mn(IV)<br>(eV) | XRD                    | EPR           | References |
|---------------------------|---------------------------------------------------|--------------------------|----|---------------------|--------------------|------------------------|---------------|------------|
| δ-001<br>MnO <sub>2</sub> | 153.9                                             | 13                       | 7  | 641.4               | 643.0              | mineral transformation | –             | This work  |
| α-310<br>MnO <sub>2</sub> | 107.3                                             | 2                        | 7  | 641.8               | 643.9              | No detectable change   | –             | This work  |
| α-110<br>MnO <sub>2</sub> | 70.4                                              | 54                       | 7  | 641.0               | 642.4              | mineral transformation | –             | This work  |
| α-MnO <sub>2</sub>        | 116.1                                             | 22                       | 7  | 642.1               | 643.2              | Peak shifts            | –             | 5          |
| γ-MnO <sub>2</sub>        | 109.1                                             | 15                       | 7  | 642.2               | 643.2              | Peak shifts            | –             | 5          |
| δ-MnO <sub>2</sub>        | 108.6                                             | 5                        | 7  | 642.4               | 643.5              | Peak shifts            | –             | 5          |
| δ-MnO <sub>2</sub>        | 42.6                                              | –                        | 7  | –                   | –                  | mineral transformation | Mn(II) signal | 6          |
| α-MnO <sub>2</sub>        | 34.5                                              | –                        | 7  | –                   | –                  | mineral transformation | Mn(II) signal | 6          |
| MO-2                      | 111.7                                             | –                        | 6  | 641.6               | 643.0              | –                      | –             | 7          |
| α-110                     | –                                                 | –                        | –  | –                   | 643.6              | –                      | –             | 3          |
| δ-001                     | –                                                 | –                        | –  | 640.6               | 641.2              | –                      | –             | 1          |

## References:

1. X. Zheng, J. Cai, Y. Cao, L. Shen, Y. Zheng, F. Liu, S. Liang, Y. Xiao and L. Jiang, Construction of cross-linked  $\delta$ -MnO<sub>2</sub> with ultrathin structure for the oxidation of H<sub>2</sub>S: Structure-activity relationship and kinetics study, *Appl. Catal. B: Environ.*, 2021, **297**, 120402.
2. S. Rong, P. Zhang, F. Liu and Y. Yang, Engineering crystal facet of  $\alpha$ -MnO<sub>2</sub> nanowire for highly efficient catalytic oxidation of carcinogenic airborne formaldehyde, *ACS Catal.*, 2018, **8**, 3435-3446.
3. W. Li, X. Cui, R. Zeng, G. Du, Z. Sun, R. Zheng, S. P. Ringer and S. X. Dou, Performance modulation of  $\alpha$ -MnO<sub>2</sub> nanowires by crystal facet engineering, *Sci. Rep.*, 2015, **5**, 8987.
4. Y. Brechbühl, I. Christl, E. J. Elzinga and R. Kretzschmar, Competitive sorption of carbonate and arsenic to hematite: Combined ATR-FTIR and batch experiments, *J Colloid Interface Sci.*, 2012, **377**, 313-321.
5. J. Nie, Z. Yao, P. Shao, Y. Jing, L. Bai, D. Xing, G. Yi, D. Li, Y. Liu and L. Yang, Revisiting the adsorption of antimony on manganese dioxide: The overlooked dissolution of manganese, *Chem. Eng. J.*, 2022, **429**, 132468.
6. D. Wei, J. Liu, Z. Luo and X. Xie, Insight into the reactions of antimonite with manganese oxides: Synergistic effects of Mn (III) and oxygen vacancies, *Water Res.*, 2023, **232**, 119681.
7. J. Luo, C. Hu, X. Meng, J. Crittenden, J. Qu and P. Peng, Antimony Removal from Aqueous Solution Using Novel  $\alpha$ -MnO<sub>2</sub> Nanofibers: Equilibrium, Kinetic, and Density Functional Theory Studies, *ACS Sustain. Chem. Eng.*, 2017, **5**, 2255-2264.
